# Supplementary material for: Nicotine Exerts a Stronger Immunosuppressive Effect Than Its Structural Analogs and Regulates Experimental Colitis in Rats
Source: MDPI journal article supplement (doi:10.3390/biomedicines11030922), 2023-03-16

## The content and composition of experimental diets MF (/100g)

| General components        |      | Vitamins              |       | Minerals       |      | Amino acids       |      |
|---------------------------|------|-----------------------|-------|----------------|------|-------------------|------|
| Water (g)                 | 7.9  | Vitamin A (IU)        | 1283  | Calcium (g)    | 1.07 | Isoleucine (g)    | 0.89 |
| Crude protein (g)         | 23.1 | Vitamin D3 (IU)       | 137   | Rin (g)        | 0.83 | leucine (g)       | 1.74 |
| Crude fat (g)             | 5.1  | Vitamin E (mg)        | 9.1   | Magnesium (g)  | 0.24 | lysine (g)        | 1.24 |
| Crude ash (g)             | 5.8  | Vitamin K3 (mg)       | 0.04  | Sodium (g)     | 0.19 | Methionine (g)    | 0.44 |
| Crude fiber (g)           | 2.8  | Vitamin B1 (mg)       | 2.05  | Potassium (g)  | 0.9  | Cystine (g)       | 0.36 |
| Nitrogen free extract (g) | 55.3 | Vitamin B2 (mg)       | 1.1   | Iron (mg)      | 10.6 | Phenylalanine (g) | 1.04 |
| Calorie (kcal)            | 359  | Vitamin C (mg)        | 4     | Aluminum (mg)  | 2.1  | Tyrosine (g)      | 0.68 |
|                           |      | Vitamin B6 (mg)       | 0.87  | Copper (mg)    | 0.78 | Threonine (g)     | 0.89 |
|                           |      | Vitamin B12 (μg)      | 5.5   | Zinc (mg)      | 4.89 | Tryptophan (g)    | 0.28 |
|                           |      | Inositol (mg)         | 439   | Cobalt (mg)    | 0.1  | Valine (g)        | 1.08 |
|                           |      | Biotin (μg)           | 27    | Manganese (mg) | 4.84 | Arginine (g)      | 1.42 |
|                           |      | Pantothenic acid (mg) | 2.45  |                |      | Histidine (g)     | 0.6  |
|                           |      | Niacin (mg)           | 10.61 |                |      | Alanine (g)       | 1.2  |
|                           |      | Choline (g)           | 0.18  |                |      | Aspartic acid (g) | 2.14 |
|                           |      | Folic acid (mg)       | 0.17  |                |      | Glutamic acid (g) | 3.99 |
|                           |      |                       |       |                |      | Glycine (g)       | 1.18 |
|                           |      |                       |       |                |      | Proline (g)       | 1.31 |
|                           |      |                       |       |                |      | Serine (g)        | 1.11 |

Oriental Yeast Co. Ltd. Homepage (Referred to 3/9/2023)

<https://www.oyc.co.jp/bio/LAD-equipment/LAD/ingredient.html>

**B-act**  
(raw data in Fig.6)

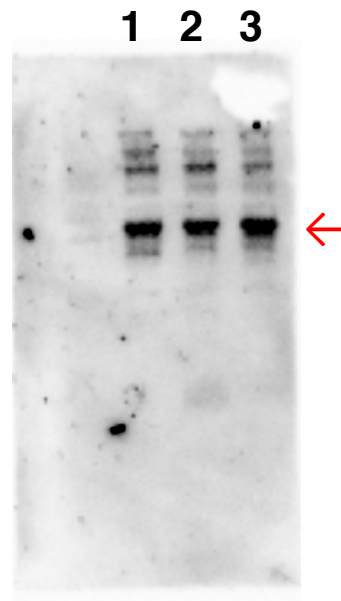

**AChR7**  
(raw data in Fig.6)

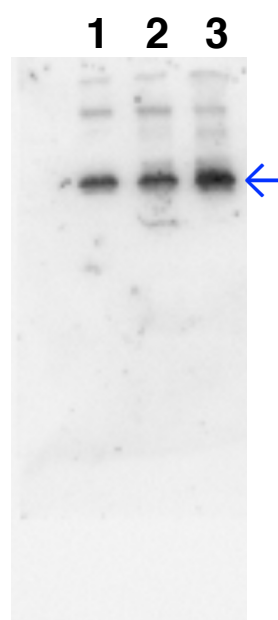

**AChR7 (raw data in Fig.10)**

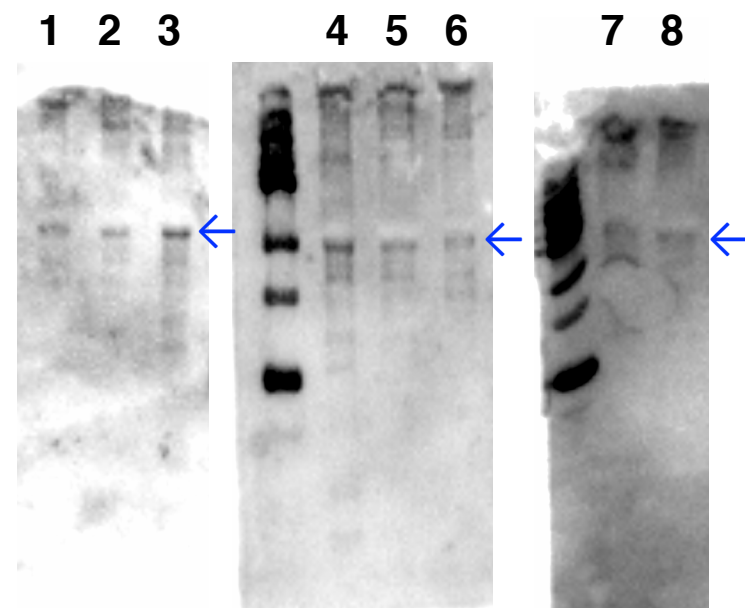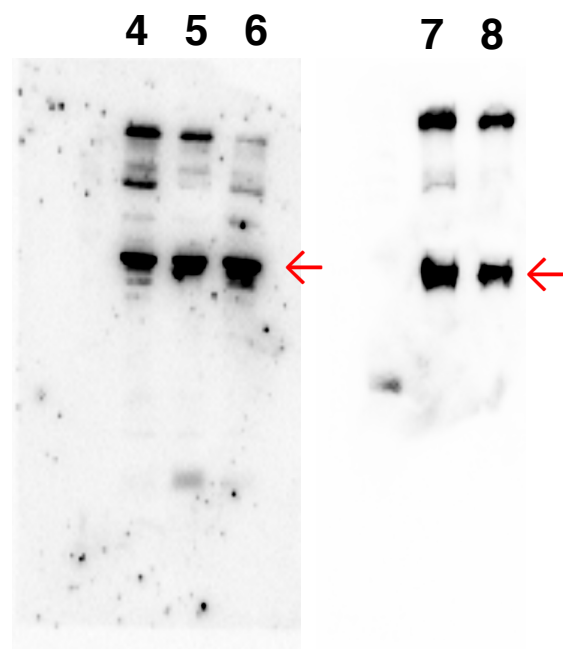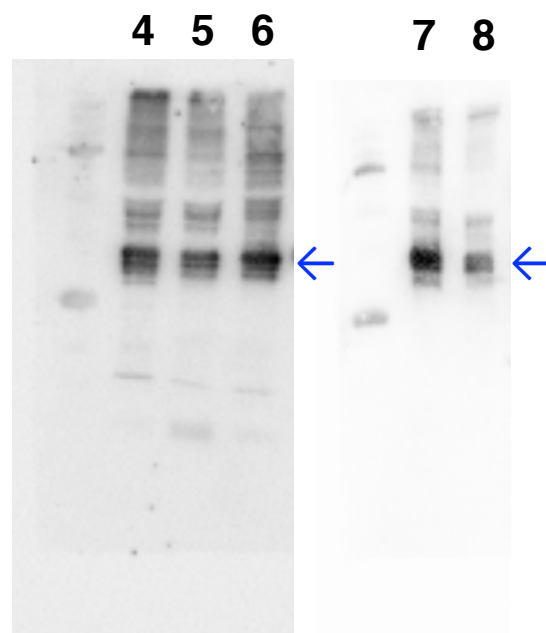

**B-act (raw data in Fig.12)**

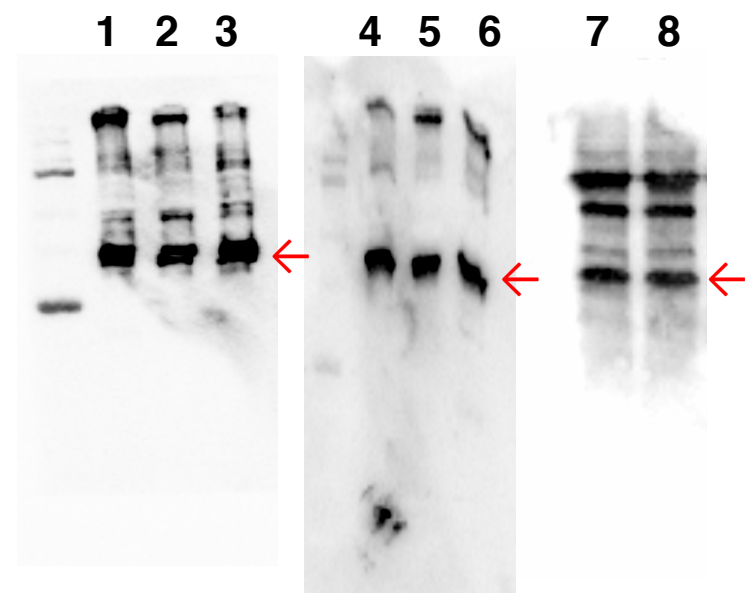

**A: DAI scores**

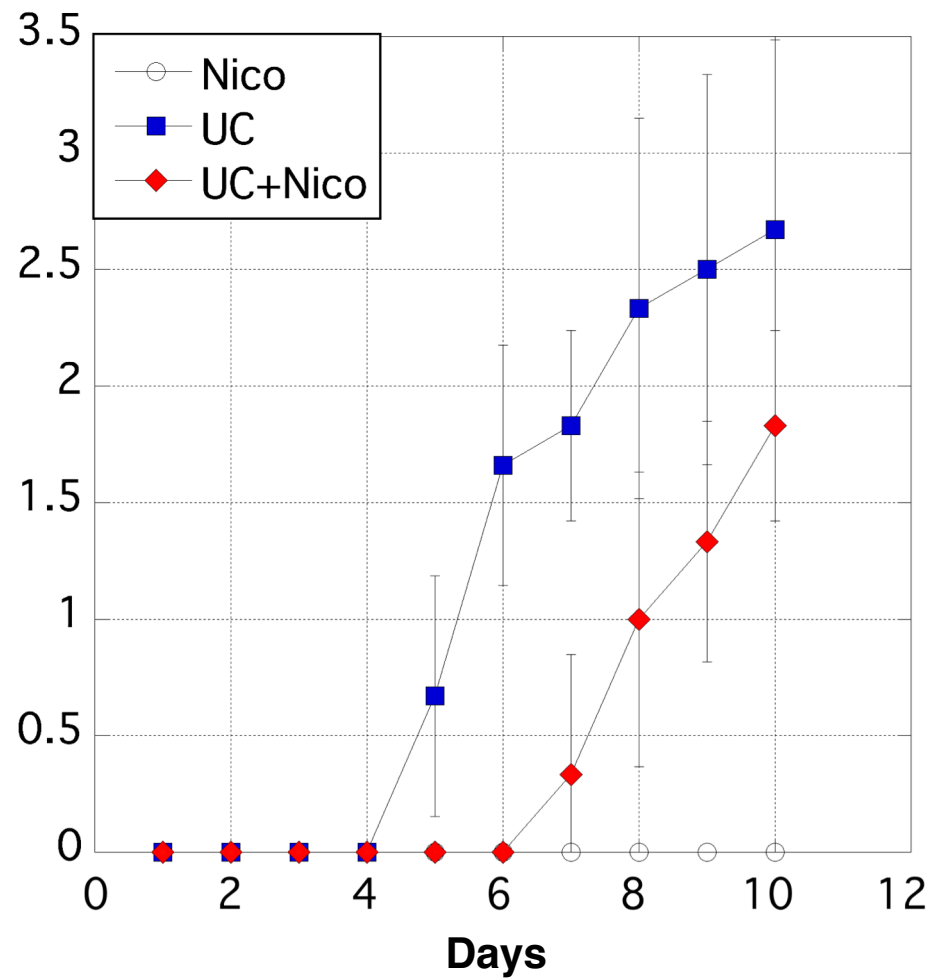

**B: DAI scores**

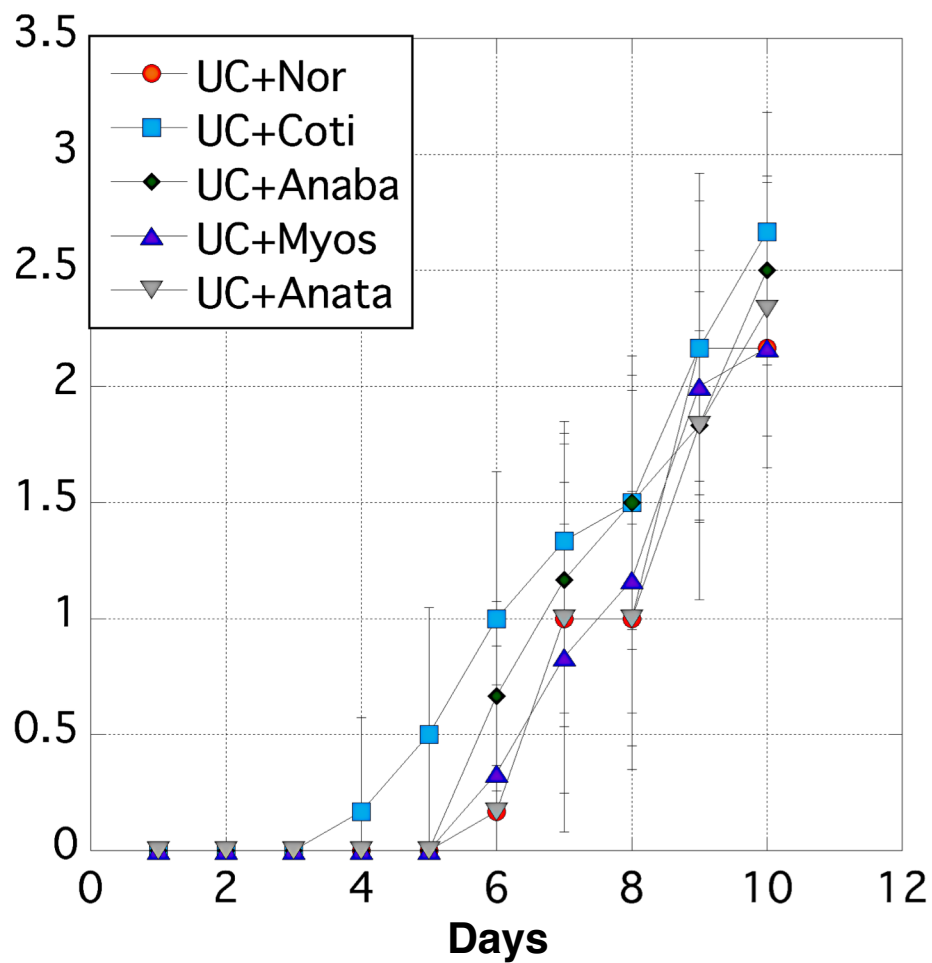

Supplement: s1 [file s1]
